# Supplementary material
Source: PubMed Central journal article supplement (PMC6640095)
Supplement: NIHMS1029500-supplement-1.pdf [file NIHMS1029500-supplement-1.pdf]

## SUPPORTING INFORMATION

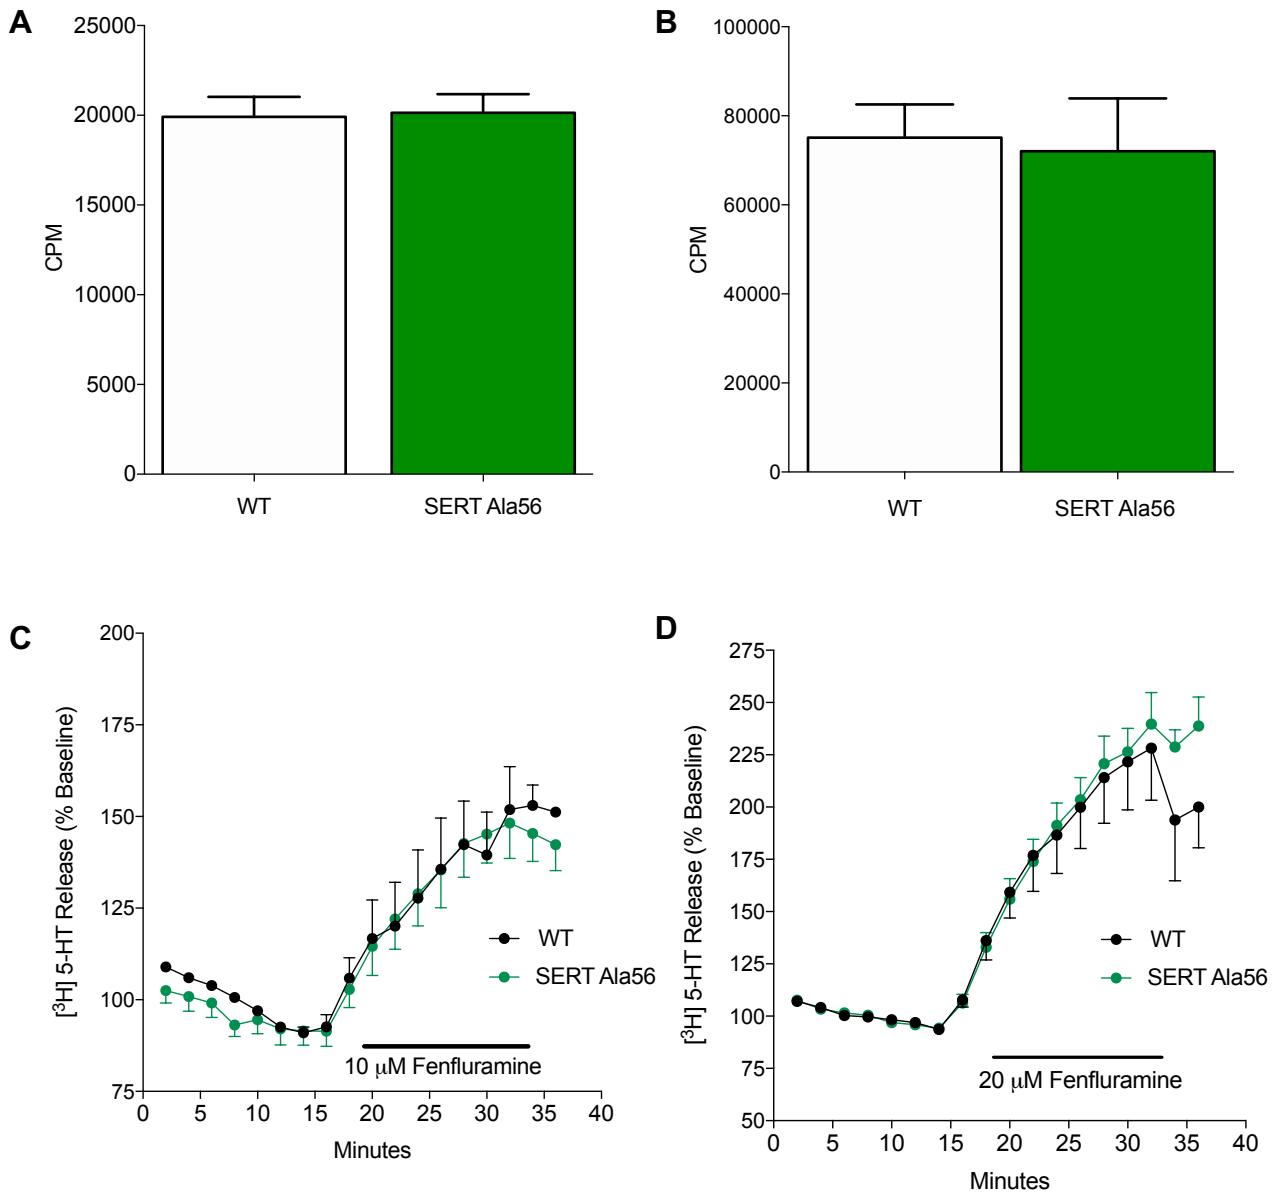

**Figure S1. High concentrations of D-fenfluramine mediated  $[^3\text{H}]5\text{-HT}$  efflux. Equal loading of  $[^3\text{H}]5\text{-HT}$  in both (A) Flp-In CHO cells and (B) hippocampal slices (unpaired t-test, n.s., n=4-5). (C-D) There is also no difference in  $[^3\text{H}]5\text{-HT}$  efflux in response to high concentrations, 10 and 20  $\mu\text{M}$ , D-fenfluramine between WT and SERT Ala56 littermate controls (two-way repeated-measures ANOVA; Bonferroni post-hoc test of genotype differences, n.s., n = 4-5).**

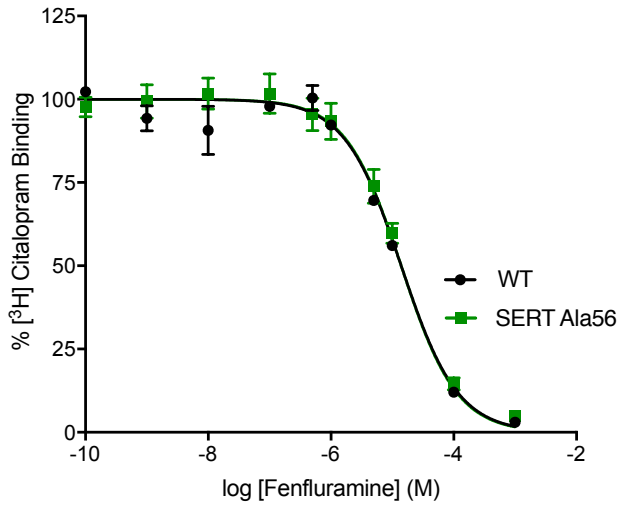

**Figure S2. D-fenfluramine competition binding assay with [<sup>3</sup>H]citalopram.** There is no difference between SERT Ala56 and WT mice in fenfluramine (0-1mM) binding as assessed by competition with [<sup>3</sup>H]citalopram (5nM) binding (two-way repeated-measures ANOVA; Bonferroni post-hoc test of genotype differences, n.s.; n=3)

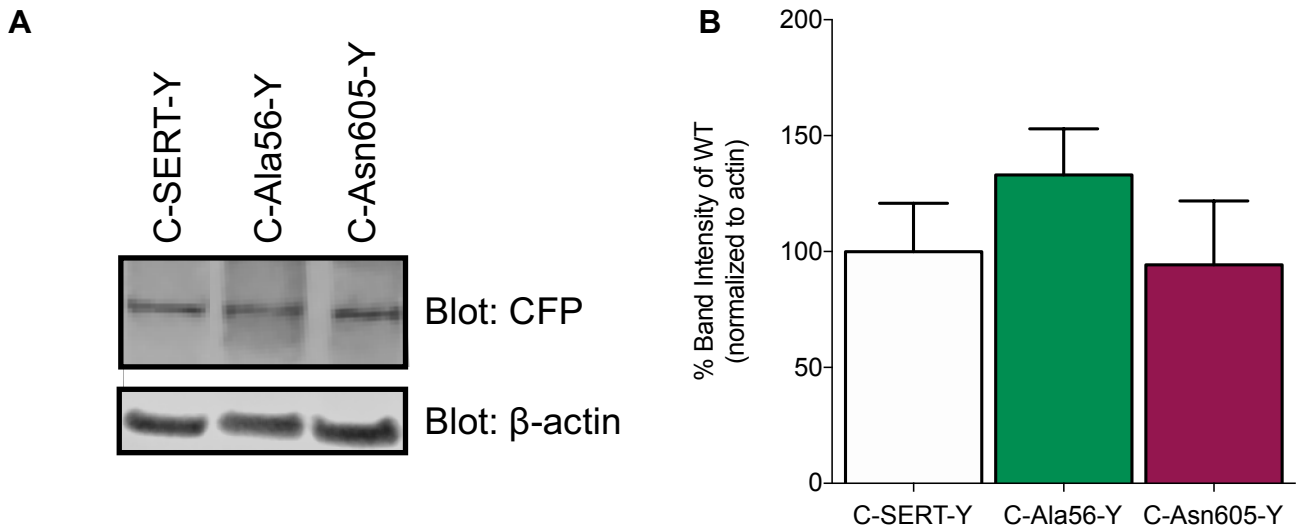

**Figure S3. Western blot of total C-SERT-Y and variant constructs.** (A) Representative immunoblot of C-SERT-Y constructs probed with CFP antibody. (B) No difference between C-SERT-Y, C-Ala56-Y, and C-Asn605-N total protein expression as assessed by densitometry of western blot bands normalized to  $\beta$ -actin levels (ordinary one-way ANOVA, followed by Dunnett's post-hoc analysis, n.s.,  $P > .05$ ,  $n = 4-7$ )
